# Supplementary material for: Hydration of α-UO3following storage under controlled conditions of temperature and relative humidity
Source: Royal Society of Chemistry journal article supplement (doi:10.1039/d0dt01852j), 2020-01-01

## Supporting Information

### Hydration of $\alpha$ - $\text{UO}_3$ following storage under controlled conditions of temperature and relative humidity

Marianne P. Wilkerson,<sup>\*a</sup> Sarah C. Hernandez,<sup>a</sup> W. Tyler Mullen,<sup>a</sup> Andrew T. Nelson,<sup>a</sup> Alison L. Pugmire,<sup>a</sup> Brian L. Scott,<sup>a</sup> Elizabeth S. Sooby,<sup>a</sup> Alison L. Tamasi,<sup>a,b</sup> Gregory L. Wagner,<sup>a</sup> and Justin R. Walensky<sup>b</sup>

<sup>a</sup>*Los Alamos National Laboratory, Los Alamos, New Mexico 87545, United States*

<sup>b</sup>*Department of Chemistry, University of Missouri-Columbia, Columbia, Missouri 65211, United States*

Table S1: Lattice parameters of the  $\alpha$ -,  $\beta$ -,  $\gamma$ -,  $\delta$ -,  $\epsilon$ -, and  $\eta$ - $\text{UO}_3$ , and unassigned phases of  $\text{UO}_3$ , as reported in references 16-34.

| phase                    | reported U:O stoichiometry | $a$ (Å)              | $b$ (Å)              | $c$ (Å)              | $\alpha$ (°) | $\beta$ (°) | $\gamma$ (°) | space group   | symmetry             | measurement       | Ref. |
|--------------------------|----------------------------|----------------------|----------------------|----------------------|--------------|-------------|--------------|---------------|----------------------|-------------------|------|
| $\alpha$ - $\text{UO}_3$ | $\text{UO}_3$              | 3.97                 | 3.97                 | 4.17                 |              | 120.0       |              | $P\bar{3}m1$  |                      | XRD               | 16*  |
|                          | $\text{UO}_3$              | 3.91                 | 6.94                 | 4.17                 |              | 90.0        |              | $C2mm$        |                      | neutron           | 16*  |
|                          | $\text{UO}_3$              | 3.91                 | 6.94                 | 4.17                 |              | 90.0        |              | $C2$          |                      | neutron           | 16*  |
|                          | $\text{UO}_3$              | 6.84                 | 43.45                | 4.157                |              |             |              | $C_{222}$     | ortho-rhombic        | neutron, electron | 17*  |
|                          | $\text{UO}_{3-x}$          |                      |                      |                      |              |             |              |               | pseudo-ortho-rhombic | XRD               | 18   |
|                          | $\text{UO}_3$              | 3.971                |                      | 4.17                 |              |             |              |               | hexagonal            | XRD               | 19*  |
|                          | $\text{UO}_3$              | 3.961<br>$\pm 0.001$ | 6.860<br>$\pm 0.002$ | 4.166<br>$\pm 0.001$ |              |             |              |               | hexagonal            | neutron           | 20   |
|                          | $\text{UO}_3$              | 3.913<br>$\pm 0.002$ | 6.936<br>$\pm 0.003$ | 4.167<br>$\pm 0.002$ |              |             |              |               | ortho-rhombic        | neutron           | 20   |
|                          | $\text{UO}_3$              | 6.878                | 3.971                | 4.168                |              |             |              |               | hexagonal            | XRD               | 21*  |
|                          | $\text{UO}_{2.94}$         | 6.863                | 3.962                | 4.167                |              |             |              |               | hexagonal            | XRD               | 21*  |
|                          | $\text{UO}_{2.71}$         | 6.823                | 3.939                | 4.144                |              |             |              |               | hexagonal            | XRD               | 21*  |
|                          | $\text{UO}_{2.90}$         | 6.944                | 3.912                | 4.160                |              |             |              |               | ortho-rhombic        | XRD               | 21*  |
|                          | $\text{UO}_3$              | 3.971                |                      | 4.17                 |              |             |              |               | hexagonal            | XRD               | 22*  |
|                          | $\text{UO}_{2.9}$          | 6.91                 | 3.92                 | 4.16                 |              |             |              |               | ortho-rhombic        | XRD               | 22*  |
| $\text{UO}_3$            | 12.98                      | 10.70                | 7.49                 |                      |              |             |              | ortho-rhombic | XRD                  | 23*               |      |

|                   |                              |                 |                |                 |    |                |       |                                                 |                    |         |     |
|-------------------|------------------------------|-----------------|----------------|-----------------|----|----------------|-------|-------------------------------------------------|--------------------|---------|-----|
|                   | UO <sub>3</sub>              | 3.963<br>±0.004 |                | 4.160<br>±0.008 |    |                |       | $C\bar{3}m - D_{3d}^3$                          | hexagonal          | XRD     | 24  |
| β-UO <sub>3</sub> | UO <sub>3</sub>              | 10.34           | 14.33          | 3.91            |    | 99.0           |       | $P2_1$                                          |                    | XRD     | 16* |
|                   | UO <sub>3</sub>              | 10.34           | 14.33          | 3.91            |    | 99.03          |       |                                                 | monoclinic         | XRD     | 19* |
|                   | UO <sub>3</sub>              | 10.34<br>±0.01  | 14.33<br>±0.01 | 3.910<br>±0.004 |    | 99.03<br>±0.02 |       | $P2_1$ or<br>$P2_1/m$                           | monoclinic         | XRD     | 25  |
|                   | UO <sub>3</sub>              | 10.34<br>±0.01  | 14.33<br>±0.01 | 3.910<br>±0.004 |    | 99.03<br>±0.01 |       | $P2_1 (C_2^2)$<br>or $P2_1/m$<br>( $C_{2h}^2$ ) | monoclinic         | XRD     | 26  |
|                   | UO <sub>3</sub>              |                 |                | 14.3            |    |                |       |                                                 | ortho-<br>rhombic? | XRD     | 22* |
| γ-UO <sub>3</sub> | UO <sub>3</sub>              | 6.90            | 6.90           | 19.98           |    | 90.0           |       | $I4_1$                                          |                    | neutron | 16* |
|                   | UO <sub>3</sub>              | 9.79            | 19.93          | 9.71            |    | 90.0           |       | $Fddd$                                          |                    | neutron | 16* |
|                   | UO <sub>3</sub> <sup>a</sup> | 6.9013(5)       | 6.9013(5)      | 19.9754(18)     |    |                |       | $I4_1/amd$                                      | tetragonal         | neutron | 27  |
|                   | UO <sub>3</sub> <sup>b</sup> | 9.787(3)        | 19.932(4)      | 9.705(3)        |    |                |       | $Fddd$                                          | ortho-<br>rhombic  | neutron | 27  |
|                   | UO <sub>3</sub> <sup>c</sup> | 9.8225(7)       | 19.8487(15)    | 9.6318(7)       |    |                |       | Pseudo- $F_{ddd}$                               | ortho-<br>rhombic  | neutron | 27  |
|                   | UO <sub>3</sub>              | 9.813(8)        | 19.93(8)       | 9.711(8)        |    |                |       | $Fddd - D_{2h}^{24}$                            |                    | XRD     | 28  |
|                   | UO <sub>3</sub>              | 9.71            | 9.77           | 19.92           |    |                |       |                                                 | ortho-<br>rhombic  | XRD     | 19* |
|                   | UO <sub>3</sub>              | 6.89            | 6.89           | 19.94           | 90 | 90             | 90.34 | $I4_1/amd$                                      | tetragonal         | XRD     | 29* |
|                   | UO <sub>3</sub>              | 13.01           | 15.48          | 7.50            |    |                |       |                                                 | ortho-<br>rhombic  |         | 22* |
|                   | UO <sub>3</sub>              | 13.08           | 15.48          | 6.91            |    | 89.63          |       |                                                 | monoclinic         | XRD     | 22* |
| δ-UO <sub>3</sub> | UO <sub>3</sub>              | 4.17            | 4.17           | 4.17            |    | 90.0           |       | $Pm\bar{3}m$                                    | cubic              | neutron | 16* |
|                   | UO <sub>3</sub>              | 4.146(12)       | 4.146(12)      | 4.146(12)       |    |                |       |                                                 | cubic              | XRD     | 30  |
|                   | UO <sub>3</sub>              | 4.165(8)        | 4.165(8)       | 4.165(8)        |    |                |       |                                                 | cubic              | neutron | 30  |
|                   | UO <sub>3</sub>              | 4.16            |                |                 |    |                |       |                                                 | cubic              | XRD     | 19* |

|                   |                 |                 |                 |                 |        |                |         |                                                       |                  |     |     |
|-------------------|-----------------|-----------------|-----------------|-----------------|--------|----------------|---------|-------------------------------------------------------|------------------|-----|-----|
|                   | UO <sub>3</sub> | 4.16            |                 |                 |        |                |         |                                                       | cubic            | XRD | 22* |
|                   | UO <sub>3</sub> | 4.138<br>±0.005 |                 |                 |        |                |         |                                                       | cubic            | XRD | 31  |
| ε-UO <sub>3</sub> | UO <sub>3</sub> | 4.002           | 3.841           | 4.165           | 98.10  | 90.20          | 120.17  |                                                       | triclinic        | XRD | 19* |
|                   | UO <sub>3</sub> |                 |                 |                 |        |                |         |                                                       |                  | XRD | 22  |
| η-UO <sub>3</sub> | UO <sub>3</sub> | 7.51            | 5.47            | 5.22            |        | 90.0           |         | <i>P</i> 2 <sub>1</sub> 2 <sub>1</sub> 2 <sub>1</sub> |                  | XRD | 16* |
|                   | UO <sub>3</sub> | 7.511<br>±0.009 | 5.466<br>±0.008 | 5.224<br>±0.008 |        |                |         | <i>P</i> 2 <sub>1</sub> 2 <sub>1</sub> 2 <sub>1</sub> | ortho<br>rhombic | XRD | 32  |
| UO <sub>3</sub>   | UO <sub>3</sub> | 4.002           | 3.841           | 4.165           | 98°17' | 90°33'         | 120°28' |                                                       | triclinic        | XRD | 33* |
|                   | UO <sub>3</sub> | 13.05<br>±0.02  | 15.45<br>±0.05  | 6.89<br>±0.02   |        | 89.63<br>±0.01 |         |                                                       | monoclinic       | XRD | 34  |

\*No error reported.

<sup>a</sup>measured at 373 K

<sup>b</sup>measured at 323, 293 K

<sup>c</sup>measured at 77 K

Note: Zachariasen assigned the α-UO<sub>3</sub> structure to hexagonal *P*3̄*m*1.<sup>16</sup> Following XRD and neutron diffraction analyses, Loopstra and Cordfunke proposed that the hexagonal assignment was incorrect, and then prepared UO<sub>2.9</sub> by thermal decomposition of uranyl peroxide at 450 °C in the absence of nitrate.<sup>20</sup> After cooling to room temperature, the UO<sub>2.9</sub> formed orthorhombic α-UO<sub>3</sub> characterized by a space group of *C*2*mm*.<sup>20</sup> The discrepancy between the densities reported by Hoekstra and Siegel (7.04 g cm<sup>-3</sup>),<sup>22</sup> Loopstra and Cordfunke (7.25 g cm<sup>-3</sup>),<sup>20</sup> and Siegel and Hoekstra (7.30 g cm<sup>-3</sup>)<sup>18</sup> versus the density also calculated by Siegel and Hoekstra (8.39 g cm<sup>-3</sup>) led Greaves and Fender to characterize α-UO<sub>3</sub> as an imperfect orthorhombic *C*222 structure in which ~12% of the U lattice sites are vacant.<sup>17</sup> In models reported separately by Greaves versus Loopstra and Cordfunke, axial oxygen (O1) sites contribute to the –oxo-U-oxo-U-oxo- chains, and equatorial oxygen (O2) sites lie in the equatorial (110) plane.<sup>17,20</sup> The O2 atoms occupy slightly distorted hexagonal bipyramidal coordination along the (001) plane. Due to the complexity of the *C*222 model, we chose to use the orthorhombic *C*2*mm* structure proposed by Loopstra and Cordfunke for our simulations.<sup>20</sup>

Table S2: Lattice parameters of hydrated UO<sub>3</sub> species, as reported in references 21, 35-50.

| reported UO <sub>2</sub> :H <sub>2</sub> O stoichiometry | species                                                                                              | a (Å)      | b (Å)          | c (Å)          | β (°)          | space group                   | symmetry      | measurement   | Ref.       |        |
|----------------------------------------------------------|------------------------------------------------------------------------------------------------------|------------|----------------|----------------|----------------|-------------------------------|---------------|---------------|------------|--------|
| UO <sub>3</sub> ·2.25H <sub>2</sub> O                    | [(UO <sub>2</sub> ) <sub>8</sub> O <sub>2</sub> (OH) <sub>12</sub> ](H <sub>2</sub> O) <sub>12</sub> | 14.337(3)  | 16.813(4)      | 14.731(4)      |                | <i>P2<sub>1</sub>ca</i>       | ortho-rhombic | XRD           | 35         |        |
| UO <sub>3</sub> ·2H <sub>2</sub> O                       | (UO <sub>2</sub> ) <sub>4</sub> O(OH) <sub>6</sub> ·5H <sub>2</sub> O                                | 14.6861(4) | 13.9799(3)     | 16.7063(5)     |                | <i>Pbcn</i>                   | ortho-rhombic | XRD           | 36         |        |
|                                                          | α-UO <sub>3</sub> ·2H <sub>2</sub> O                                                                 |            |                |                |                |                               |               | XRD           | 21         |        |
|                                                          | β-UO <sub>3</sub> ·2H <sub>2</sub> O                                                                 |            |                |                |                |                               |               | ortho-rhombic | XRD        | 21     |
|                                                          |                                                                                                      |            | 13.977 ±0.004  | 16.696 ±0.004  | 14.672 ±0.004  |                               |               | ortho-rhombic |            | 37     |
|                                                          | UO <sub>3</sub> ·2H <sub>2</sub> O                                                                   |            | 13.997(4)      | 16.696(4)      | 14.672(4)      |                               | <i>Pbna</i>   | ortho-rhombic |            | 38     |
|                                                          |                                                                                                      |            |                |                |                |                               |               |               | EXAFS      | 39     |
| UO <sub>3</sub> ·H <sub>2</sub> O                        | α-UO <sub>2</sub> (OH) <sub>2</sub>                                                                  | 4.2455(6)  | 10.3183(16)    | 6.8648(10)     |                | <i>Cmca</i><br>or <i>C2cb</i> |               |               | 40         |        |
|                                                          |                                                                                                      | 4.242(1)   | 10.302(1)      | 6.868(1)       |                | <i>Cmca</i><br>or <i>C2cb</i> | ortho-rhombic | XRD           | 38, 41, 42 |        |
|                                                          |                                                                                                      |            |                |                |                |                               |               | neutron       | 42         |        |
|                                                          |                                                                                                      |            |                |                |                |                               |               | ortho-rhombic | XRD        | 43     |
|                                                          | β-UO <sub>2</sub> (OH) <sub>2</sub>                                                                  |            | 5.6438(1)      | 6.2867(1)      | 9.9372(2)      |                               | <i>Pbca</i>   | ortho-rhombic | XRD        | 38, 40 |
|                                                          |                                                                                                      |            | 5.6438 ±0.0001 | 6.2867 ±0.0001 | 9.9372 ±0.0002 |                               | <i>Pbca</i>   | ortho-rhombic | XRD        | 44     |

|                                            |                                                        |                  |                    |                 |                |                                                                                                                                 |                   |           |        |
|--------------------------------------------|--------------------------------------------------------|------------------|--------------------|-----------------|----------------|---------------------------------------------------------------------------------------------------------------------------------|-------------------|-----------|--------|
|                                            |                                                        |                  |                    |                 |                |                                                                                                                                 |                   | neutron   | 42, 45 |
|                                            |                                                        | 6.295<br>±0.005  | 5.636<br>±0.005    | 9.92<br>±0.01   |                | <i>Fmmm</i>                                                                                                                     | ortho-<br>rhombic | XRD       | 46     |
|                                            | $\gamma$ - $\text{UO}_2(\text{OH})_2$                  | 6.419(2)         | 5.518(2)           | 5.561(2)        | 112.77         | <i>P2<sub>1</sub>/c</i>                                                                                                         | monoclinic        | XRD       | 38     |
|                                            |                                                        | 5.560(3)         | 5.522(3)           | 6.416(3)        | 112.71         | <i>P2<sub>1</sub>/c</i>                                                                                                         | monoclinic        | XRD       | 47     |
|                                            |                                                        |                  |                    |                 |                |                                                                                                                                 |                   | XRD       | 21     |
|                                            |                                                        |                  |                    |                 |                |                                                                                                                                 | hexagonal         | XRD       | 43     |
|                                            | $\delta$ - $\text{UO}_2(\text{OH})_2$                  |                  |                    |                 |                |                                                                                                                                 |                   | XRD       | 21     |
|                                            |                                                        |                  |                    |                 |                |                                                                                                                                 |                   | triclinig | XRD    |
|                                            | $\varepsilon$ - $\text{UO}_3 \cdot \text{H}_2\text{O}$ | 6.419<br>±0.002  | 5.518<br>±0.002    | 5.561<br>±0.002 | 112°46'<br>±3' | <i>C<sub>m</sub>(C<sub>s</sub><sup>3</sup>),<br/>C2(C<sub>2</sub><sup>3</sup>)<br/>or C2/m<br/>(C<sub>2h</sub><sup>3</sup>)</i> | monoclinic        | XRD       | 48     |
|                                            | $\text{UO}_2(\text{OH})_2$                             | 5.635<br>±0.007  | 6.285<br>±0.008    | 9.919<br>±0.008 |                | <i>Pbca</i>                                                                                                                     | ortho-<br>rhombic | XRD       | 49     |
|                                            |                                                        | 5.638<br>±0.005  | 6.273<br>±0.005    | 9.925<br>±0.005 |                | <i>Pbca</i>                                                                                                                     | ortho-<br>rhombic | XRD       | 50     |
| $\text{UO}_3 \cdot 0.08\text{H}_2\text{O}$ | $\alpha$ - $\text{UO}_3 \cdot 0.8\text{H}_2\text{O}$   | 4.27-<br>4.30(1) | 10.19-<br>10.24(1) | 6.86-6.96(1)    |                |                                                                                                                                 | ortho-<br>rhombic | XRD       | 38     |
|                                            | $\beta$ - $\text{UO}_3 \cdot 0.8\text{H}_2\text{O}$    |                  |                    |                 |                |                                                                                                                                 | ortho-<br>rhombic | XRD       | 21     |
|                                            | $\text{UO}_3 \cdot 0.8\text{H}_2\text{O}$              | 10.23<br>±0.01   | 6.89<br>±0.01      | 4.28<br>±0.01   |                |                                                                                                                                 | ortho-<br>rhombic | XRD       | 50     |

Table S3: Conditions (temperature, relative humidity), resultant water vapor density, and salt used to prepare saturated aqueous solutions used for storage of  $\alpha$ - $\text{UO}_3$  subsamples.<sup>11,59-61</sup>

| condition | temperature (°C) | relative humidity (%) | water vapor density (g/cm <sup>3</sup> ) | salt used to prepare saturated aqueous solution |
|-----------|------------------|-----------------------|------------------------------------------|-------------------------------------------------|
| 1         | 5                | 25                    | $1.7 \times 10^{-6}$                     | lithium iodide                                  |
| 2         | 37               | 15                    | $6.6 \times 10^{-6}$                     | lithium iodide                                  |
| 3         | 5                | 97                    | $6.7 \times 10^{-6}$                     | potassium nitrate                               |
| 4         | 37               | 89                    | $39 \times 10^{-6}$                      | potassium nitrate                               |

Table S4: Fit results of  $\alpha$ - $\text{UO}_3$  at time 0 and after 0.5 years of storage under Condition 1, Condition 2, Condition 3, and Condition 4. The  $k^3$ -weighted U  $L_{III}$ -edge data are transformed between  $k = [2.5 - 15.0 \text{ \AA}^{-1}]$  and narrowed by a Gaussian window of  $0.3 \text{ \AA}^{-1}$ . Fit range is between  $R = [1.5 \text{ \AA} - 6.5 \text{ \AA}]$ ;  $S_0^2$  is constrained to 1.0; and the number of scatterers  $N$ , the distance  $R$ , and the Debye-Waller factor are varied. A multiple scattering path summing all the high  $R$  multiple scattering paths ( $R > 4.5 \text{ \AA}$ ) was included. Reported errors are determined using a Monte Carlo method and primarily reflect reproducibility.<sup>76</sup> Absolute errors for  $\sigma^2$  and  $R$  are  $\sim 10\%$  and  $0.005 \text{ \AA}$  for near neighbors, and  $20\%$  and  $0.02 \text{ \AA}$  for further neighbors, respectively.

|                      | time 0 |                 |                          | time 0.5 years Condition 1 |                 |                          | time 0.5 years Condition 2 |                 |                          |
|----------------------|--------|-----------------|--------------------------|----------------------------|-----------------|--------------------------|----------------------------|-----------------|--------------------------|
| U $L_{III}$ edge     | $N$    | $R(\text{\AA})$ | $\sigma^2(\text{\AA}^2)$ | $N$                        | $R(\text{\AA})$ | $\sigma^2(\text{\AA}^2)$ | $N$                        | $R(\text{\AA})$ | $\sigma^2(\text{\AA}^2)$ |
| U-O                  | -      | -               | -                        | 1.1                        | 1.667           | 0.0030                   | 1.3                        | 1.765           | 0.0025                   |
| U-O                  | 0.5    | 1.926           | 0.0100                   | 1.1                        | 2.111           | 0.0029                   | 3.3                        | 2.034           | 0.0040                   |
| U-O                  | 2.6    | 2.220           | 0.0025                   | 2.2                        | 2.269           | 0.0022                   | -                          | -               | -                        |
| U-O                  | 0.1    | 2.482           | 0.0025                   | 1.7                        | 2.540           | 0.0050                   | 4.2                        | 2.649           | 0.0049                   |
| U-U                  | 7.2    | 3.779           | 0.0096                   | -                          | -               | -                        | -                          | -               | -                        |
| U-U                  | 6.9    | 4.162           | 0.0031                   | 0.6                        | 4.124           | 0.0025                   | 1.9                        | 4.035           | 0.0069                   |
| $\Delta E_0$ $R(\%)$ |        | -13.0 31        |                          |                            | -4.4 24         |                          |                            | 10 27           |                          |
|                      |        |                 |                          | time 0.5 years Condition 3 |                 |                          | time 0.5 years Condition 4 |                 |                          |
| U $L_{III}$ edge     |        |                 |                          | $N$                        | $R(\text{\AA})$ | $\sigma^2(\text{\AA}^2)$ | $N$                        | $R(\text{\AA})$ | $\sigma^2(\text{\AA}^2)$ |
| U-O                  |        |                 |                          | 2.0                        | 1.763           | 0.2500                   | 2.3                        | 1.760           | 0.0027                   |
| U-O                  |        |                 |                          | 5.0                        | 2.033           | 0.0045                   | 3.6                        | 2.038           | 0.0026                   |
| U-O                  |        |                 |                          | 2.9                        | 2.347           | 0.0040                   | 3.7                        | 2.360           | 0.0047                   |
| U-O                  |        |                 |                          | 2.9                        | 2.662           | 0.0029                   | 1.9                        | 2.689           | 0.0025                   |
| U-U                  |        |                 |                          | -                          | -               | -                        | -                          | -               | -                        |
| U-U                  |        |                 |                          | 2.9                        | 4.036           | 0.0099                   | 2.3                        | 4.072           | 0.0081                   |
| $\Delta E_0$ $R(\%)$ |        |                 |                          |                            | 6.9 20          |                          |                            | 2.1 20          |                          |



Table S5: Fit results of  $\alpha$ - $\text{UO}_3$  at time 0 and after 3 years of storage under Condition 1, Condition 2, Condition 3, and Condition 4. The  $k^3$ -weighted U  $L_{III}$ -edge data are transformed between  $k$  – [2.5 – 15.0  $\text{\AA}^{-1}$ ] and narrowed by a Gaussian window of 0.3  $\text{\AA}^{-1}$ . Fit range is between  $R$  = [1.5  $\text{\AA}$  – 6.5  $\text{\AA}$ ] with  $N$ ,  $R$ , and  $\sigma^2$  varying and  $S_0^2$  fixed to 1.0. Reported errors are similar to those reported in Table S-4.

|                      | time 0 |                 |                          | time 3 years Condition 1 |                 |                          | time 3 years Condition 2 |                 |                          |
|----------------------|--------|-----------------|--------------------------|--------------------------|-----------------|--------------------------|--------------------------|-----------------|--------------------------|
| U $L_{III}$ edge     | $N$    | $R(\text{\AA})$ | $\sigma^2(\text{\AA}^2)$ | $N$                      | $R(\text{\AA})$ | $\sigma^2(\text{\AA}^2)$ | $N$                      | $R(\text{\AA})$ | $\sigma^2(\text{\AA}^2)$ |
| U-O                  | -      | -               | -                        | 1.1                      | 1.842           | 0.0025                   | 1.3                      | 1.767           | 0.0050                   |
| U-O                  | 0.5    | 1.926           | 0.0100                   | 0.9                      | 2.145           | 0.0025                   | 3.3                      | 2.040           | 0.0025                   |
| U-O                  | 2.6    | 2.220           | 0.0025                   | -                        | -               | -                        | -                        | -               | -                        |
| U-O                  | 0.1    | 2.482           | 0.0025                   | 1.6                      | 2.715           | 0.0062                   | 4.0                      | 2.643           | 0.0034                   |
| U-U                  | 7.2    | 3.779           | 0.0096                   | 1.0                      | 3.831           | 0.0025                   | -                        | -               | -                        |
| U-U                  | 6.9    | 4.162           | 0.0031                   | 3.6                      | 4.186           | 0.0025                   | 0.9                      | 3.979           | 0.0025                   |
| $\Delta E_0$ $R(\%)$ |        | -13.0 31        |                          |                          | -10 23          |                          |                          | 10 26           |                          |
|                      |        |                 |                          | time 3 years Condition 3 |                 |                          | time 3 years Condition 4 |                 |                          |
| U $L_{III}$ edge     |        |                 |                          | $N$                      | $R(\text{\AA})$ | $\sigma^2(\text{\AA}^2)$ | $N$                      | $R(\text{\AA})$ | $\sigma^2(\text{\AA}^2)$ |
| U-O                  |        |                 |                          | 1.8                      | 1.764           | 0.0025                   | 1.9                      | 1.770           | 0.0025                   |
| U-O                  |        |                 |                          | 3.6                      | 2.063           | 0.0025                   | 4.8                      | 2.032           | 0.0047                   |
| U-O                  |        |                 |                          | 3.5                      | 2.362           | 0.0025                   | 2.2                      | 2.345           | 0.0025                   |
| U-O                  |        |                 |                          | 1.4                      | 2.715           | 0.0100                   | 4.6                      | 2.668           | 0.0100                   |
| U-U                  |        |                 |                          | -                        | -               | -                        | -                        | -               | -                        |
| U-U                  |        |                 |                          | 1.5                      | 4.031           | 0.0025                   | 2.3                      | 4.009           | 0.0085                   |
| $\Delta E_0$ $R(\%)$ |        |                 |                          |                          | 1.6 38          |                          |                          | 1.6 25          |                          |

Table S6. Lattice constants  $a$ ,  $b$ ,  $c$ ,  $\alpha$ ,  $\beta$ , and  $\gamma$  of the lattice constants from those of the theoretically relaxed  $\alpha$ - $\text{UO}_3$  structure following addition of 1, 2 or 3 interstitial  $\text{H}_2\text{O}$  molecules or 1, 2 or 3 interstitial OH groups into the relaxed  $\alpha$ - $\text{UO}_3$  lattice.

|                        | $a$ (Å) | $b$ (Å) | $c$ (Å) | $\% \Delta a$ | $\% \Delta b$ | $\% \Delta c$ | $\alpha$ (°) | $\beta$ (°) | $\gamma$ (°) |
|------------------------|---------|---------|---------|---------------|---------------|---------------|--------------|-------------|--------------|
| Theoretical            | 3.953   | 6.827   | 4.177   | -             | -             | -             | 90           | 90          | 90           |
| 1 $\text{H}_2\text{O}$ | 4.296   | 6.384   | 4.264   | 8.323         | -6.701        | 2.076         | 93.635       | 90.269      | 87.903       |
| 2 $\text{H}_2\text{O}$ | 4.286   | 7.175   | 4.321   | 8.090         | 4.981         | 3.392         | 90.206       | 93.758      | 90.100       |
| 3 $\text{H}_2\text{O}$ | 4.021   | 7.459   | 4.325   | 1.700         | 8.859         | 3.498         | 92.764       | 93.984      | 90.648       |
| 1 OH                   | 4.368   | 6.495   | 4.307   | 9.980         | -4.974        | 3.067         | 94.558       | 90.156      | 93.055       |
| 2 OH                   | 4.321   | 6.490   | 4.519   | 8.905         | -5.052        | 7.885         | 89.475       | 89.774      | 90.879       |
| 3 OH                   | 4.231   | 7.628   | 4.251   | 6.803         | 11.088        | 1.776         | 90.153       | 90.729      | 101.149      |

Table S7. Average U-O1 and U-O2 bond lengths and U-U distances calculated for relaxed structures of  $\alpha$ -UO<sub>3</sub> following addition of 1, 2 or 3 interstitial H<sub>2</sub>O molecules and 1, 2 or 3 interstitial OH groups into the  $\alpha$ -UO<sub>3</sub> lattice. Numbers in the parentheses indicate the percent of U-O1, U-O2 and U-U bonds that are the theoretical bonds in unperturbed  $\alpha$ -UO<sub>3</sub>.

|                    | <b>U-O1 (Å)</b> | <b>U-O2 (Å)</b> | <b>U-U (Å)</b> |
|--------------------|-----------------|-----------------|----------------|
| Experimental       | 2.083           | 2.096           | 3.961          |
| Theoretical        | 2.088           | 2.279           | 3.947          |
| 1 H <sub>2</sub> O | 1.895 (43.06%)  | 1.892 (20.37%)  | 3.801 (32.61%) |
| 2 H <sub>2</sub> O | 1.873 (41.67%)  | 2.036 (40.74%)  | 3.766 (16.85%) |
| 3 H <sub>2</sub> O | 1.876 (40.28%)  | 1.876 (13.43%)  | 3.761 (17.93%) |
| 1 OH               | 1.876 (40.28%)  | 2.023 (37.96%)  | 3.814 (28.80%) |
| 2 OH               | 1.848 (40.28%)  | 1.848 (13.43%)  | 3.783 (26.63%) |
| 3 OH               | 1.894 (40.28%)  | 2.001 (36.57%)  | 3.732 (15.22%) |

Table S8: Final state, bond lengths and angles of initial 1, 2 or 3 H<sub>2</sub>O molecules and 1, 2 or 3 OH groups after relaxation.

| Initial            | Final                                                               | O-H (Å)             | O-H-O (°)         | O2-H (Å)                            | O2-H-O2 (°) | O-O2 (Å)       |
|--------------------|---------------------------------------------------------------------|---------------------|-------------------|-------------------------------------|-------------|----------------|
| 1 H <sub>2</sub> O | 1 H <sub>2</sub> O                                                  | 0.992, 1.026        | 109.867           | -                                   | -           | -              |
| 2 H <sub>2</sub> O | 4 OH,<br>1 O <sub>2</sub>                                           | 0.982               | -                 | 0.979,<br>0.982,<br>1.002           | -           | 1.447          |
| 3H <sub>2</sub> O  | 2 H <sub>2</sub> O,<br>2 OH,<br>2 O <sub>2</sub>                    | 0.975, 1.010        | 107.028           | 0.978,<br>0.986,<br>1.001,<br>1.020 | 112.469     | 1.387, 1.441   |
| 1 OH               | 1 OH                                                                | 0.990               | -                 | -                                   | -           | -              |
| 2 OH               | 2 OH,<br>1 O <sub>2</sub>                                           | 1.009               | -                 | 0.981                               | -           | 1.474          |
| 3 OH               | 3 OH,<br>2 O <sub>2</sub>                                           | 0.985               | -                 | 0.988,<br>0.998                     | -           | 1.424, 1.474   |
| Experimental       | OH <sup>-</sup><br>H <sub>2</sub> O<br>O <sub>2</sub> <sup>2-</sup> | 0.970<br>0.958<br>- | -<br>104.450<br>- | -<br>-<br>-                         | -<br>-<br>- | -<br><br>1.447 |

Figure S1. Fourier Transforms (FTs) of U  $L_{III}$  EXAFS data (solid black line) and fit (dashed black line) for  $\alpha$ - $UO_3$  at time 0.

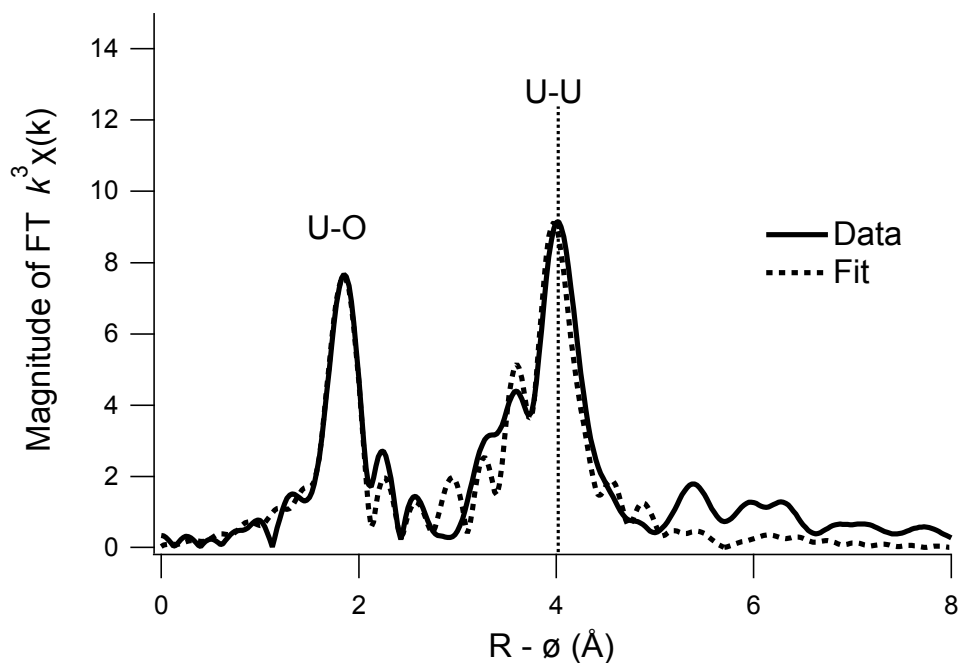

Figure S2. Fourier Transforms (FTs) of U  $L_{III}$  EXAFS data for  $\alpha$ - $UO_3$  after storage for 0.5 years under Condition 1. Data is shown as solid lines; fits to the data are displayed as dashed lines.

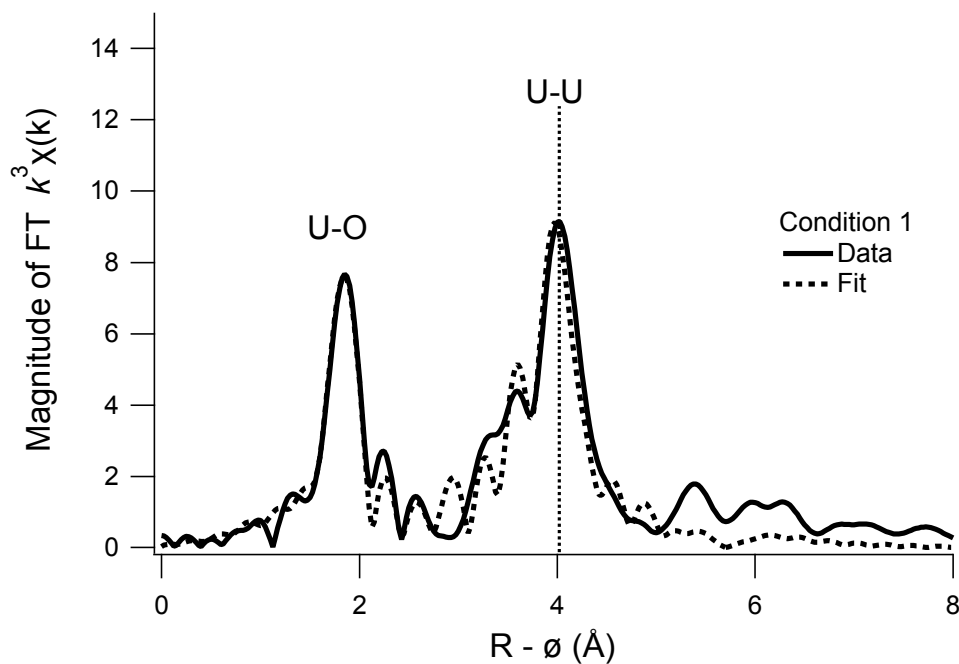

Figure S3. Fourier Transforms (FTs) of U L<sub>III</sub> EXAFS data for  $\alpha$ -UO<sub>3</sub> after storage for 0.5 years under Condition 2. Data is shown as solid lines; fits to the data are displayed as dashed lines.

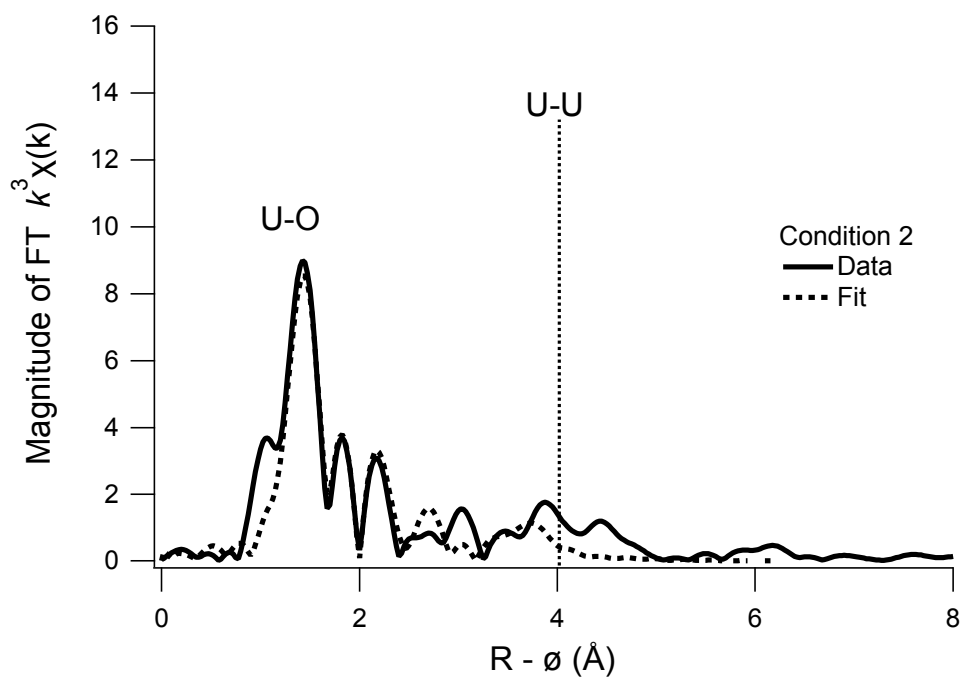

Figure S4. Fourier Transforms (FTs) of U L<sub>III</sub> EXAFS data for  $\alpha$ -UO<sub>3</sub> after storage for 0.5 years under Condition 3. Data is shown as solid lines; fits to the data are displayed as dashed lines.

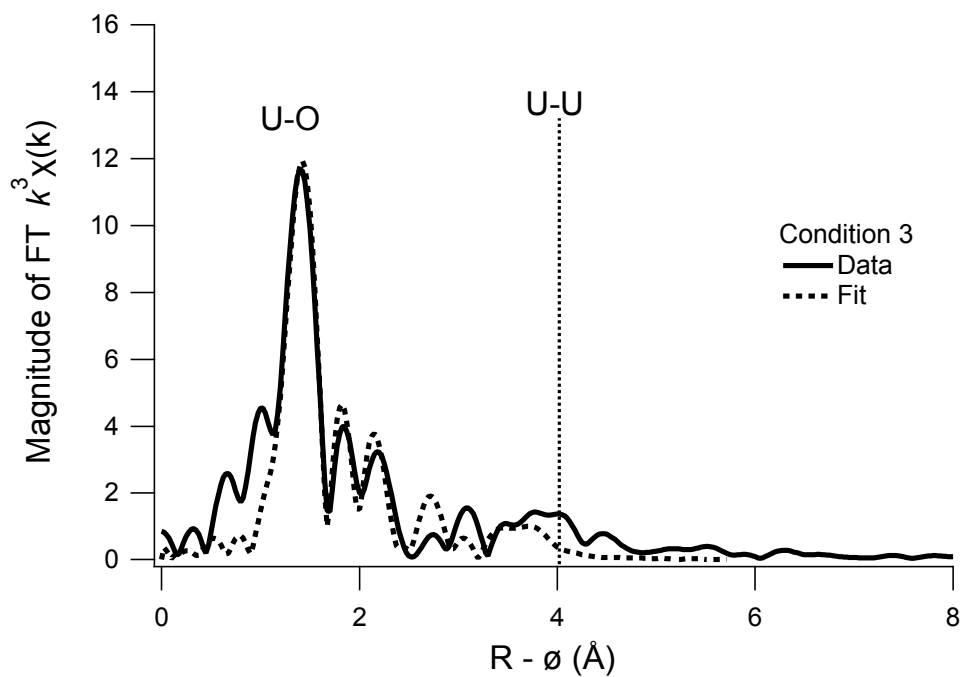

Figure S5. Fourier Transforms (FTs) of U  $L_{III}$  EXAFS data for  $\alpha$ - $UO_3$  after storage for 0.5 years under Condition 4. Data is shown as solid lines; fits to the data are displayed as dashed lines.

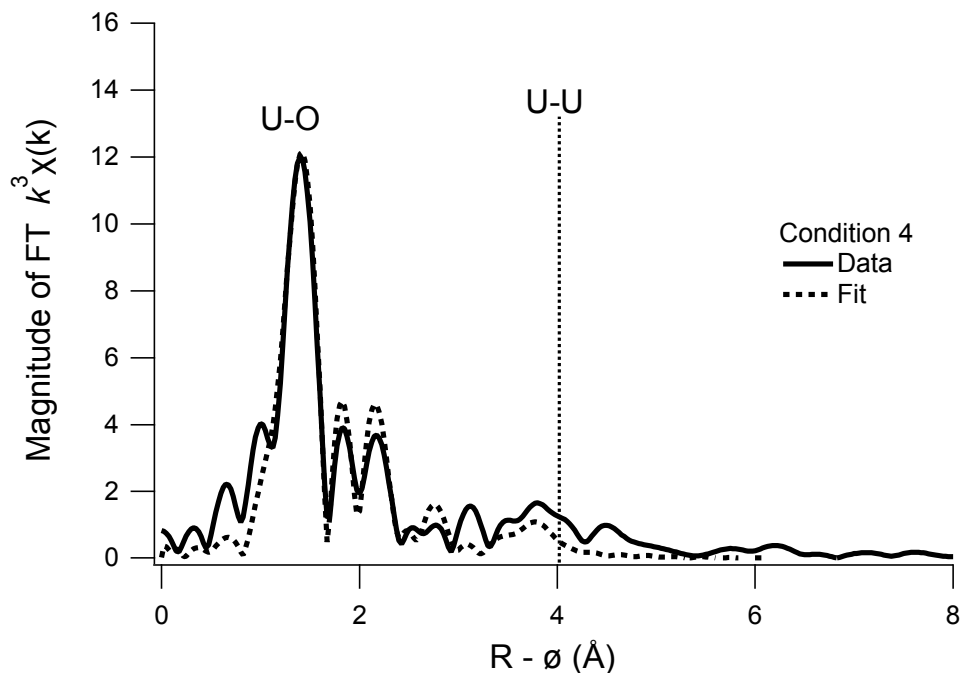

Figure S6. Fourier Transforms (FTs) of U  $L_{III}$  EXAFS data for  $\alpha$ - $UO_3$  after storage for 3 years under Condition 1. Data is shown as solid lines; fits to the data are displayed as dashed lines.

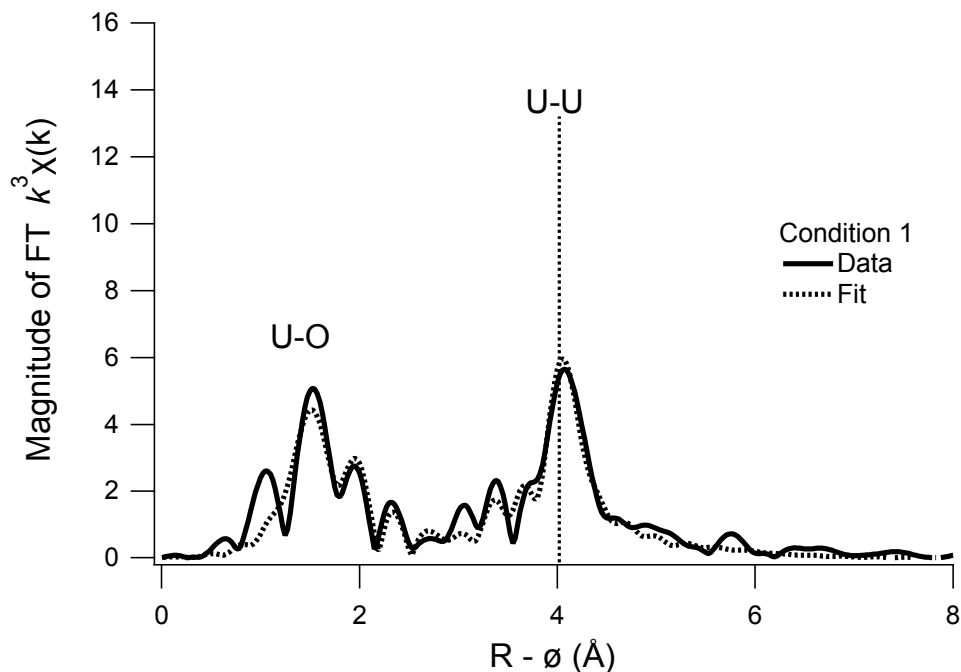

Figure S7. Fourier Transforms (FTs) of U  $L_{III}$  EXAFS data for  $\alpha$ - $UO_3$  after storage for 3 years under Condition 2. Data is shown as solid lines; fits to the data are displayed as dashed lines.

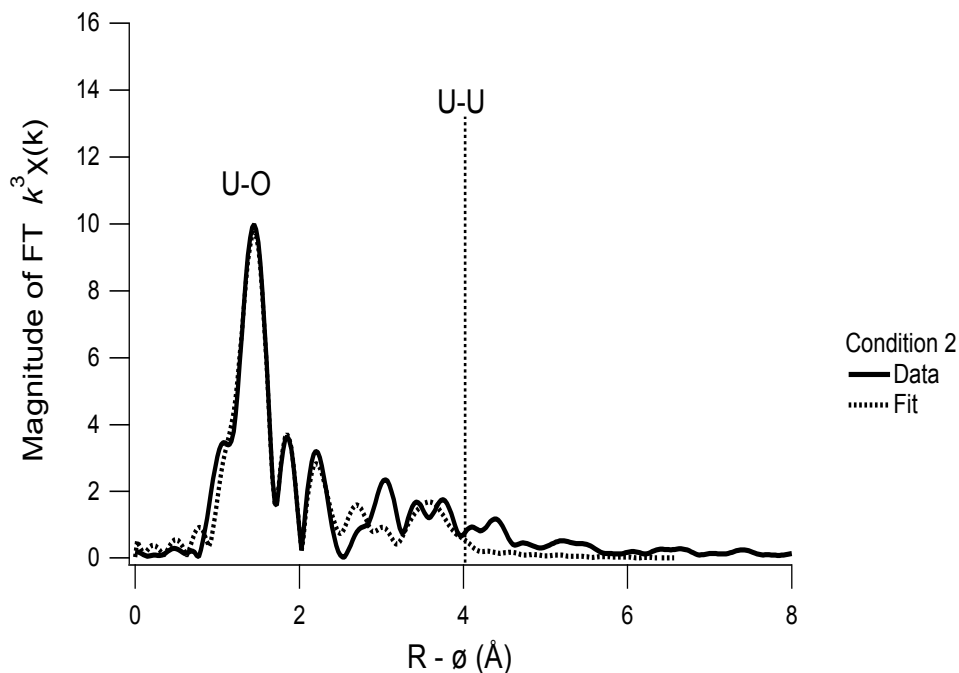

Figure S8. Fourier Transforms (FTs) of U  $L_{III}$  EXAFS data for  $\alpha$ - $UO_3$  after storage for 3 years under Condition 3. Data is shown as solid lines; fits to the data are displayed as dashed lines.

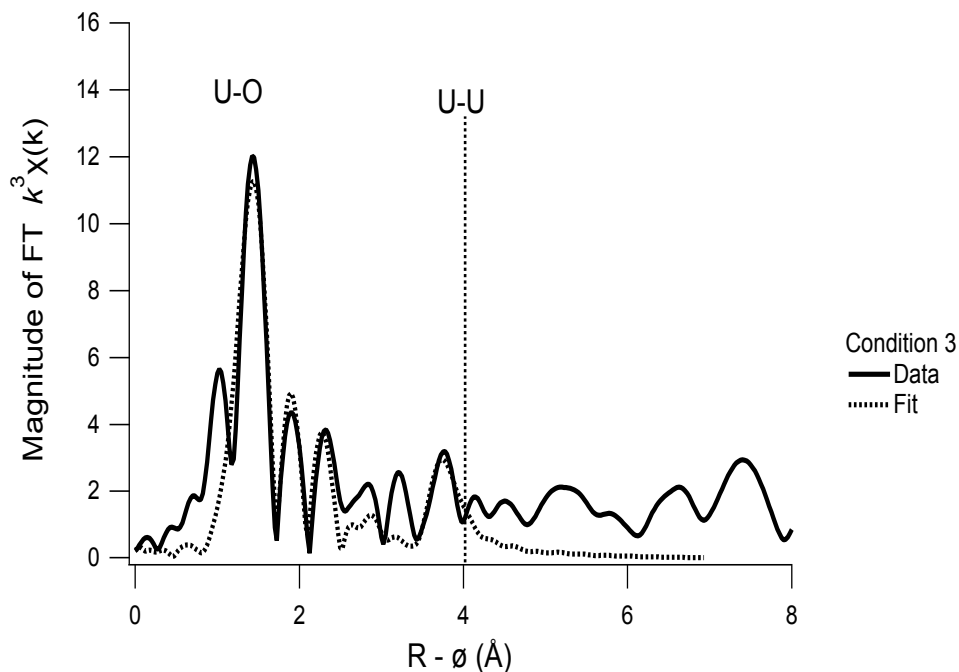



Figure S9. Fourier Transforms (FTs) of U  $L_{III}$  EXAFS data for  $\alpha$ - $UO_3$  after storage for 3 years under Condition 4. Data is shown as solid lines; fits to the data are displayed as dashed lines.

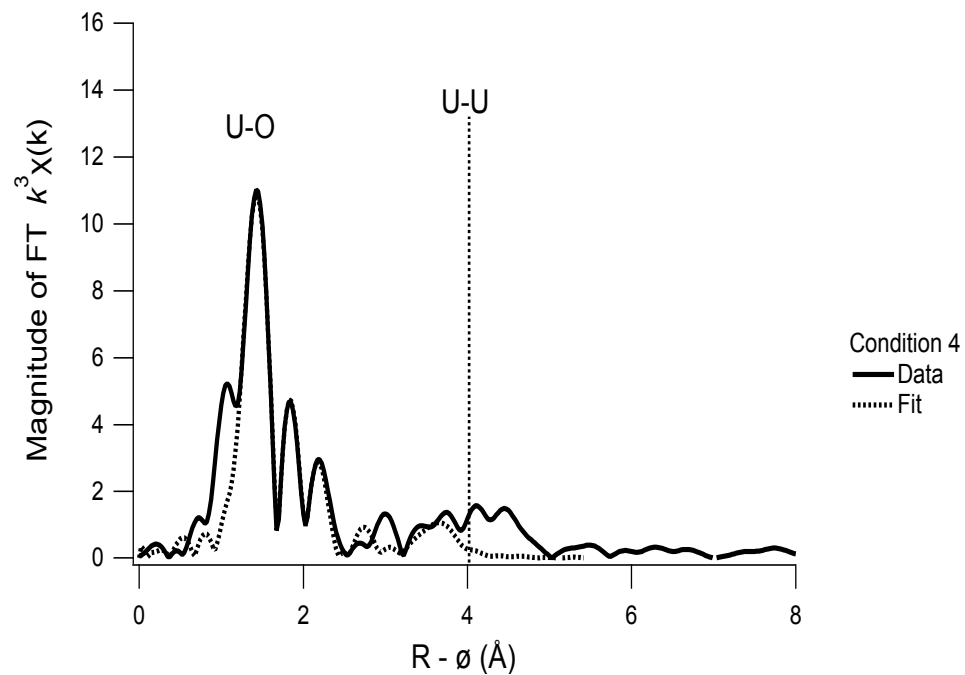

Figure S10. X-ray diffraction pattern of  $\alpha$ - $\text{UO}_3$  sample stored under Condition 1 for 5 years. The composition is predominantly  $\alpha$ - $\text{UO}_3$  as indicated by the orange peak markers for PDF 00-012-0043. The arrow indicates a small contribution from  $\text{UO}_3 \cdot x\text{H}_2\text{O}$  type phases.

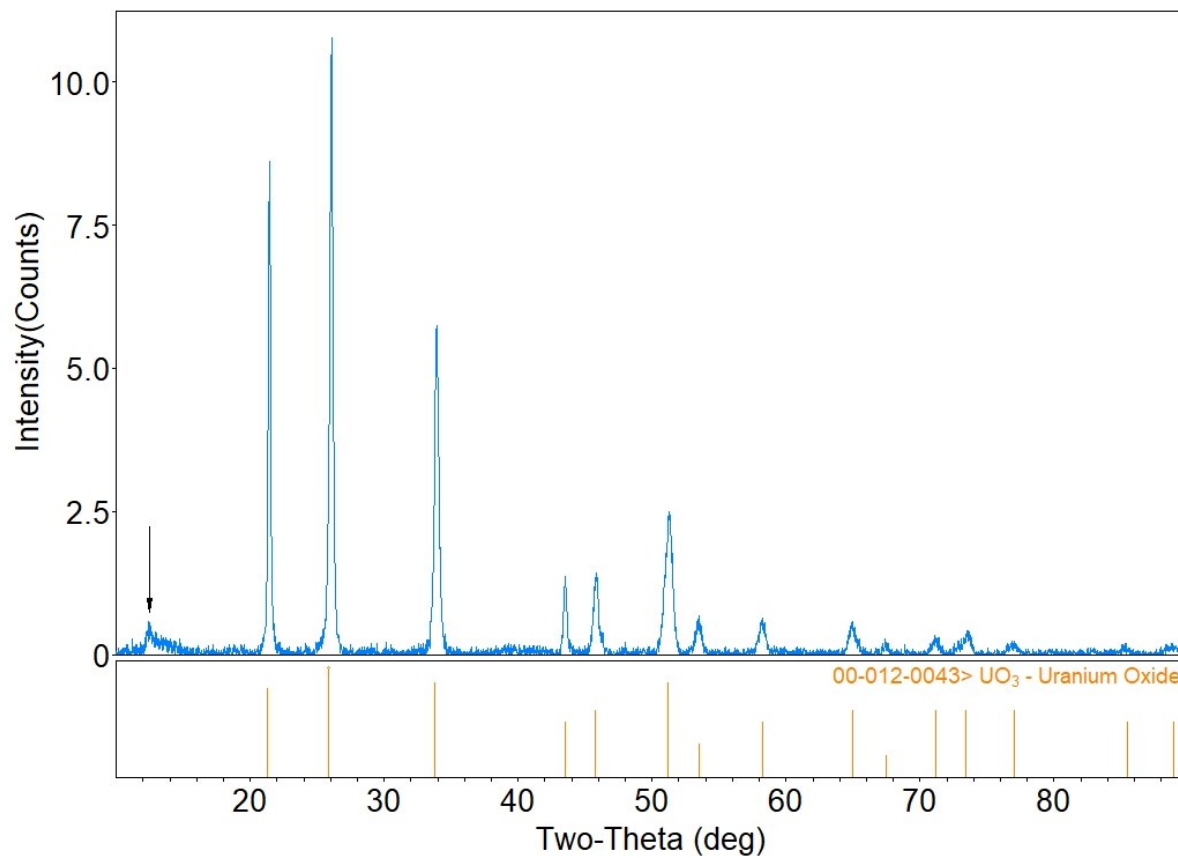

Supplement: d0dt01852j1.pdf [file d0dt01852j1.pdf]
